# Supplementary material for: Amyloid-Forming Corpora Amylacea and Spheroid-Type Amyloid Deposition: Comprehensive Analysis Using Immunohistochemistry, Proteomics, and a Literature Review
Source: MDPI journal article supplement (doi:10.3390/ijms25074040), 2024-04-04
Supplement: s1 [file s1]

## Online Supplemental Material

**Supplementary Table S1.** Details of the antibodies used in this study.

| Antibody         | Source                      | Clone      | Dilution | Antigen retrieval  |
|------------------|-----------------------------|------------|----------|--------------------|
| Igλ              | Abcam                       | polyclonal | 1:1600   | 98% FA (1 min)     |
| β2-microglobulin | GeneTex                     | polyclonal | 1:3000   | 98% FA (1 min)     |
| Lysozyme C       | Santa Cruz<br>Biotechnology | E-5        | 1:150    | 98% FA (1 min)     |
| PSP-A            | Abcam                       | 6F10       | 1:4000   | 98% FA (1 min)     |
| PSP-B            | Santa Cruz<br>Biotechnology | F-2        | 1:4000   | 98% FA (1 min)     |
| Lactoferrin      | Santa Cruz<br>Biotechnology | B97        | 1:150    | 98% FA (1 min)     |
| Olfactomedin 4   | Abcam                       | polyclonal | 1:50     | Heat (20 min, pH6) |
| p62              | Biomol                      | polyclonal | 1:3000   | Heat (20 min, pH6) |

**Abbreviations:** FA, formic acid; PSP-A, pulmonary surfactant protein A; PSP-B, pulmonary surfactant protein B; Immunostaining was performed using the Leica Bond-IV automation and Leica Refine detection kits (Leica Biosystems, Bannockburn, IL, USA) according to the manufacturer's instructions. All sections were counterstained with hematoxylin.

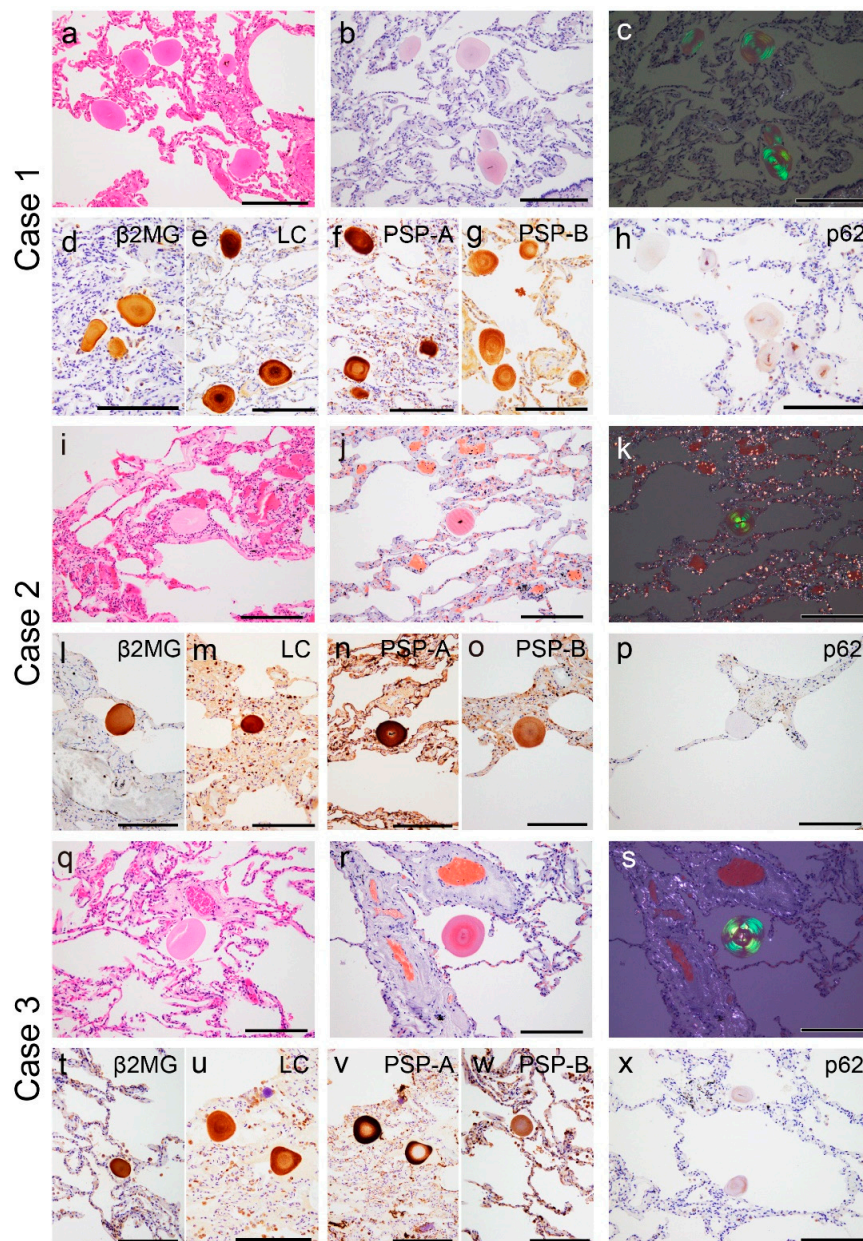

**Supplementary Figure S1.** Representative microphotographs of the pulmonary corpora amylacea (CA) in all three cases. (a–h) Pulmonary CA Case 1; (i–p) Case 2; (q–x) Case 3. (a, i, q) Hematoxylin and eosin (H&E) staining; phenol Congo red (pCR) staining under bright field (b, j, r) and polarized light (c, k, s); Immunohistochemistry for  $\beta$ 2-microglobulin ( $\beta$ 2MG) (d, l, t); lysozyme C (LC) (e, m, u); pulmonary surfactant protein A (PSP-A) (f, n, v); PSP-B (g, o, w); and p62 (h, p, x). In all cases, CAs were round and eosinophilic deposits showed concentric laminations by H&E staining. In addition, all CAs exhibited congophilic and clear apple-green birefringence under polarized light. Furthermore, all CAs showed immunoreactivity for  $\beta$ 2MG, LC, PAP-A, and PSP-B. In contrast, immunoreactivity for p62 was weak and focal in Cases 1 and 3, whereas it was almost negative in Case 2. Scale bar = 200  $\mu$ m (a–x).



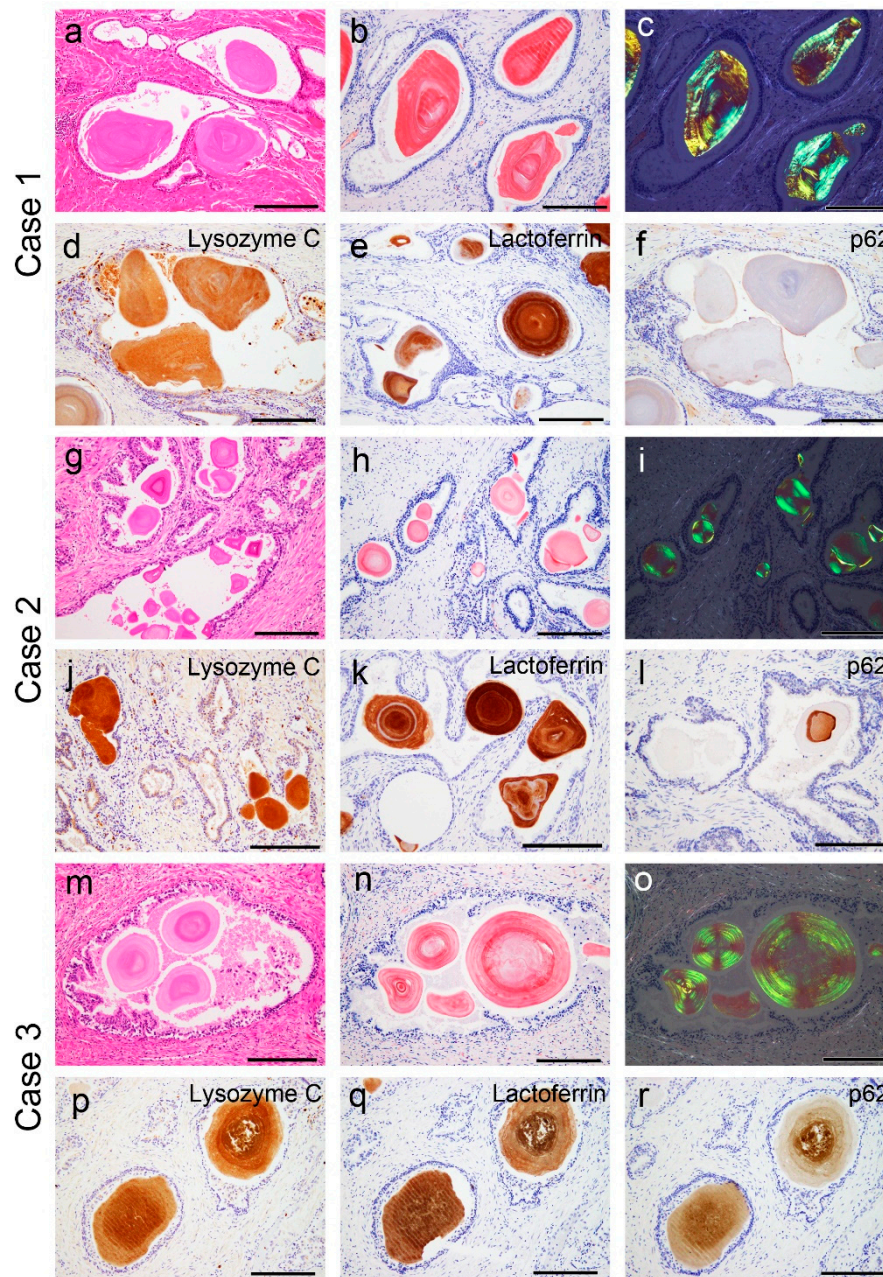

**Supplementary Figure S2.** Representative microphotographs of prostatic CA in all three patients. (a–f) Prostatic CA Case 1; (g–l) Case 2; and (m–r) Case 3. (a, g, m) H&E staining; pCR staining under bright field (b, h, n) and polarized light (c, i, o); Immunohistochemistry for lysozyme C (d, j, p); lactoferrin (e, k, q); and p62 (f, l, r). For all cases, the CAs were round and eosinophilic deposits showed concentric laminations by H&E staining. In addition, all CAs exhibited congophilic and clear apple-green birefringence under polarized light. Furthermore, all CAs showed immunoreactivity for lysozyme C and lactoferrin. Immunoreactivity for p62 was moderate in Case 3, but weak and focal in Cases 1 and 2. Scale bar = 200  $\mu$ m (a–r).

**a** PSP-A

1 MWLCPLALT ILMAASGAAC EVKDVCVGSP GIPGTPGSHG LPGRDGRDGV  
51 KGDPGPPGPM GPPGETPCPP GNNGLPGAPG VPGERGEKGE AGERGPPGLP  
101 AHLDEELQAT LHDFRHQILQ 123-137 138-157 TRGALSLQGS IMTVGEKVFS SNGQSITFDA  
151 167-179 181-199 IQEACARAGG RIAVPRNPEE NEATASFVKK YNTYAYVGLT EGPSPGDFRY  
201 SDGTPVNYTN WYRGEPAGRG KEQCVEMYTD GQWNRNCLY SRLTICEF

**b** PSP-B

1 MAESHLQWL LLLLPTLCGP GTAAWTSSL ACAQGPEFWC QSLEQALQCR  
51 ALGHCLQEVW GHVGADDLCQ ECEDIVHILN KMAKEAIFQD 95-106 TMRKFLEQEC  
101 201-212 NVLPLKLLMP QCNQVLDDYF PLVIDYFQNG TDSNGICMHL GLCKSRQPEP  
151 EQEPGMSDPL PKPLRDPLPD PLLDKLVLPV LPGALQARPG PHTQDLSEQQ  
201 218-224 225-252 FPIPLPYCWL CRALIKRIQA MIPKGALAVA VAQVCRVVPL VAGGICQCLA  
251 253-264 265-272 287-295 ERYSVILLDT LLGRMLPQLV CRLVLRCSMD DSAGPRSPTG EWLPRDSECH  
301 337-352 LCMSVTTQAG NSSEQAIPQA MLQACVGSWL DREKCKQFVE QHTPQLLTLV  
351 PRGWAHTTC QALGVCGTMS SPLQCIHSPD L

**Supplementary Figure S3.** Proteomic analysis results for PSP-A and PSP-B in pulmonary CA lesions in Case 1. (a) PSP-A and (b) PSP-B. Detected peptides with peptide scores of 30 or higher in the MASCOT analysis are shown in red.



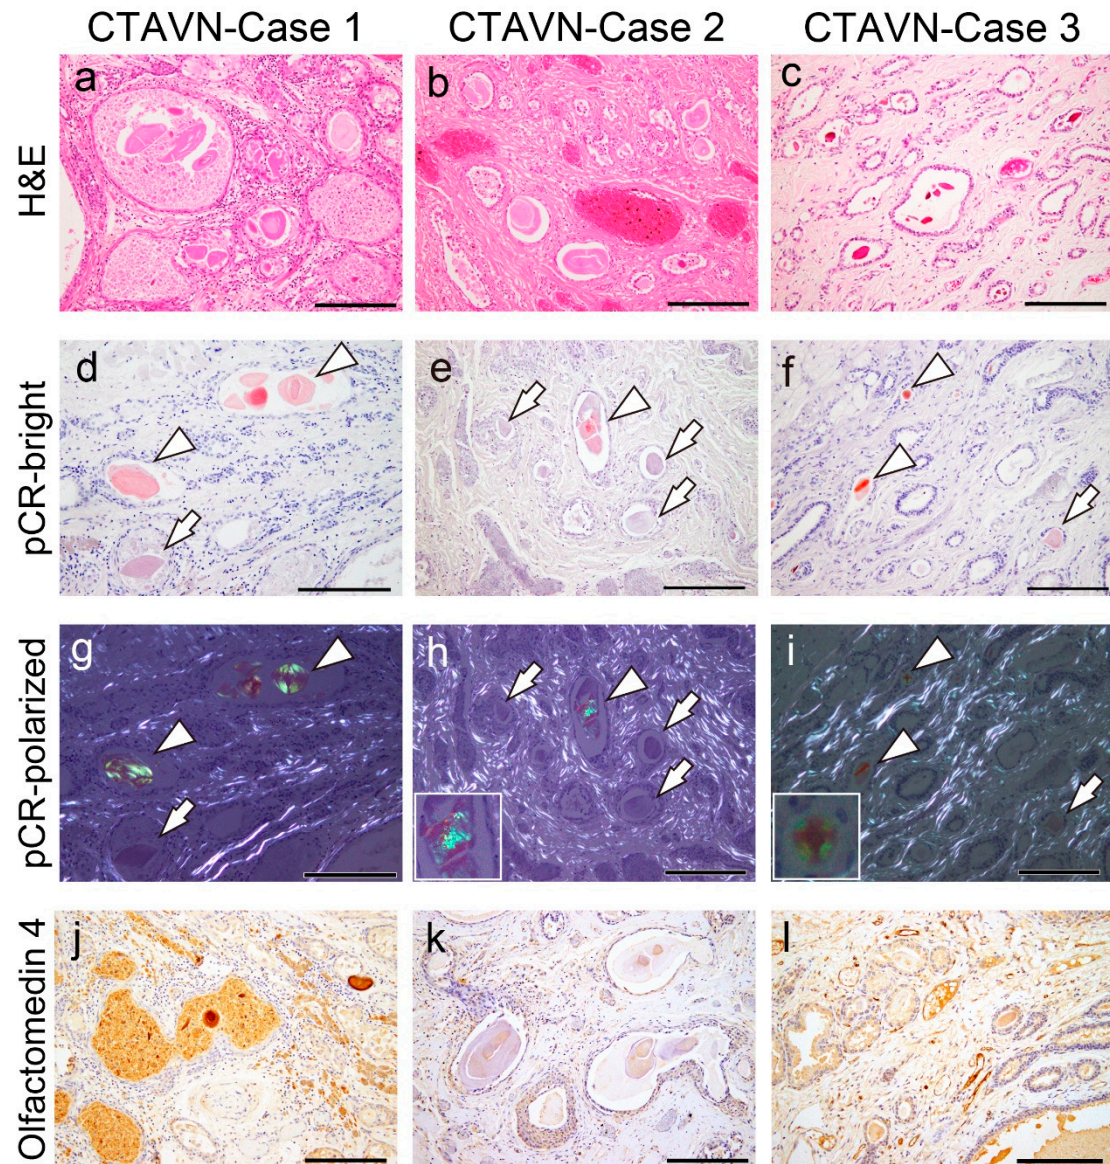

**Supplementary Figure S4.** Representative microphotographs of cystic tumors of the atrioventricular node (CTAVN)-associated CA in all three cases. (a, d, g, j) Prostatic CA Case 1; (b, e, h, k) Case 2; (c, f, i, l) Case 3. (a–c) H&E staining; pCR staining under bright field (d–f) and polarized light (g–i); (j–l) Immunohistochemistry for olfactomedin 4. For all cases, the CAs were round and eosinophilic deposits showed concentric laminations by H&E staining. For pCR staining, the CAs showed very weak (arrow) to moderate congophilia (arrowhead) (d–f), and those exhibiting moderate congophilia showed apple-green birefringence under polarized light (arrowhead) (g–i). Immunoreactivity of the CAs to olfactomedin 4 was strong in Case 1 (j), negative to weakly positive in Case 2 (k), and weakly positive in Case 3 (l). Scale bar = 200  $\mu$ m (c–e).
